# Supplementary material for: Systemic vasoconstriction and mortality in patients with heart failure and reduced ejection fraction: A cohort of patients who underwent non-invasive hemodynamic monitoring
Source: PubMed Central journal article supplement (PMC11661613; doi:10.1371/journal.pone.0312582), 2024-12-20
Supplement: pone.0312582.s002.pdf [file pone.0312582.s002.pdf]

## Reviewer Comments

I had the pleasure of reviewing the manuscript titled "Systemic Vasoconstriction and Mortality in Patients with Heart Failure and Reduced Ejection Fraction: A Cohort of Patients Who Underwent Non-Invasive Hemodynamic Monitoring." The manuscript effectively discusses and evaluates the prognostic significance of non-invasively identified systemic vasoconstriction in patients with decompensated heart failure and reduced ejection fraction (HF<sub>r</sub>EF). It should be free of grammatical and typographical errors. For instance, on line 141, the word "according" is missing a "to" after it. I recommend that the manuscript be reviewed for similar mistakes.
